# Supplementary material for: Targeting CDCP1 boost CD8+ T cells-mediated cytotoxicity in cervical cancer via the JAK/STAT signaling pathway
Source: PubMed Central journal article supplement — J Immunother Cancer. 2024 Oct 24;12(10):e009416. doi: 10.1136/jitc-2024-009416 (PMC11529519; doi:10.1136/jitc-2024-009416), 2024-10-24
Supplement: jitc-12-10-s001.pdf [file jitc-12-10-s001.pdf]

A

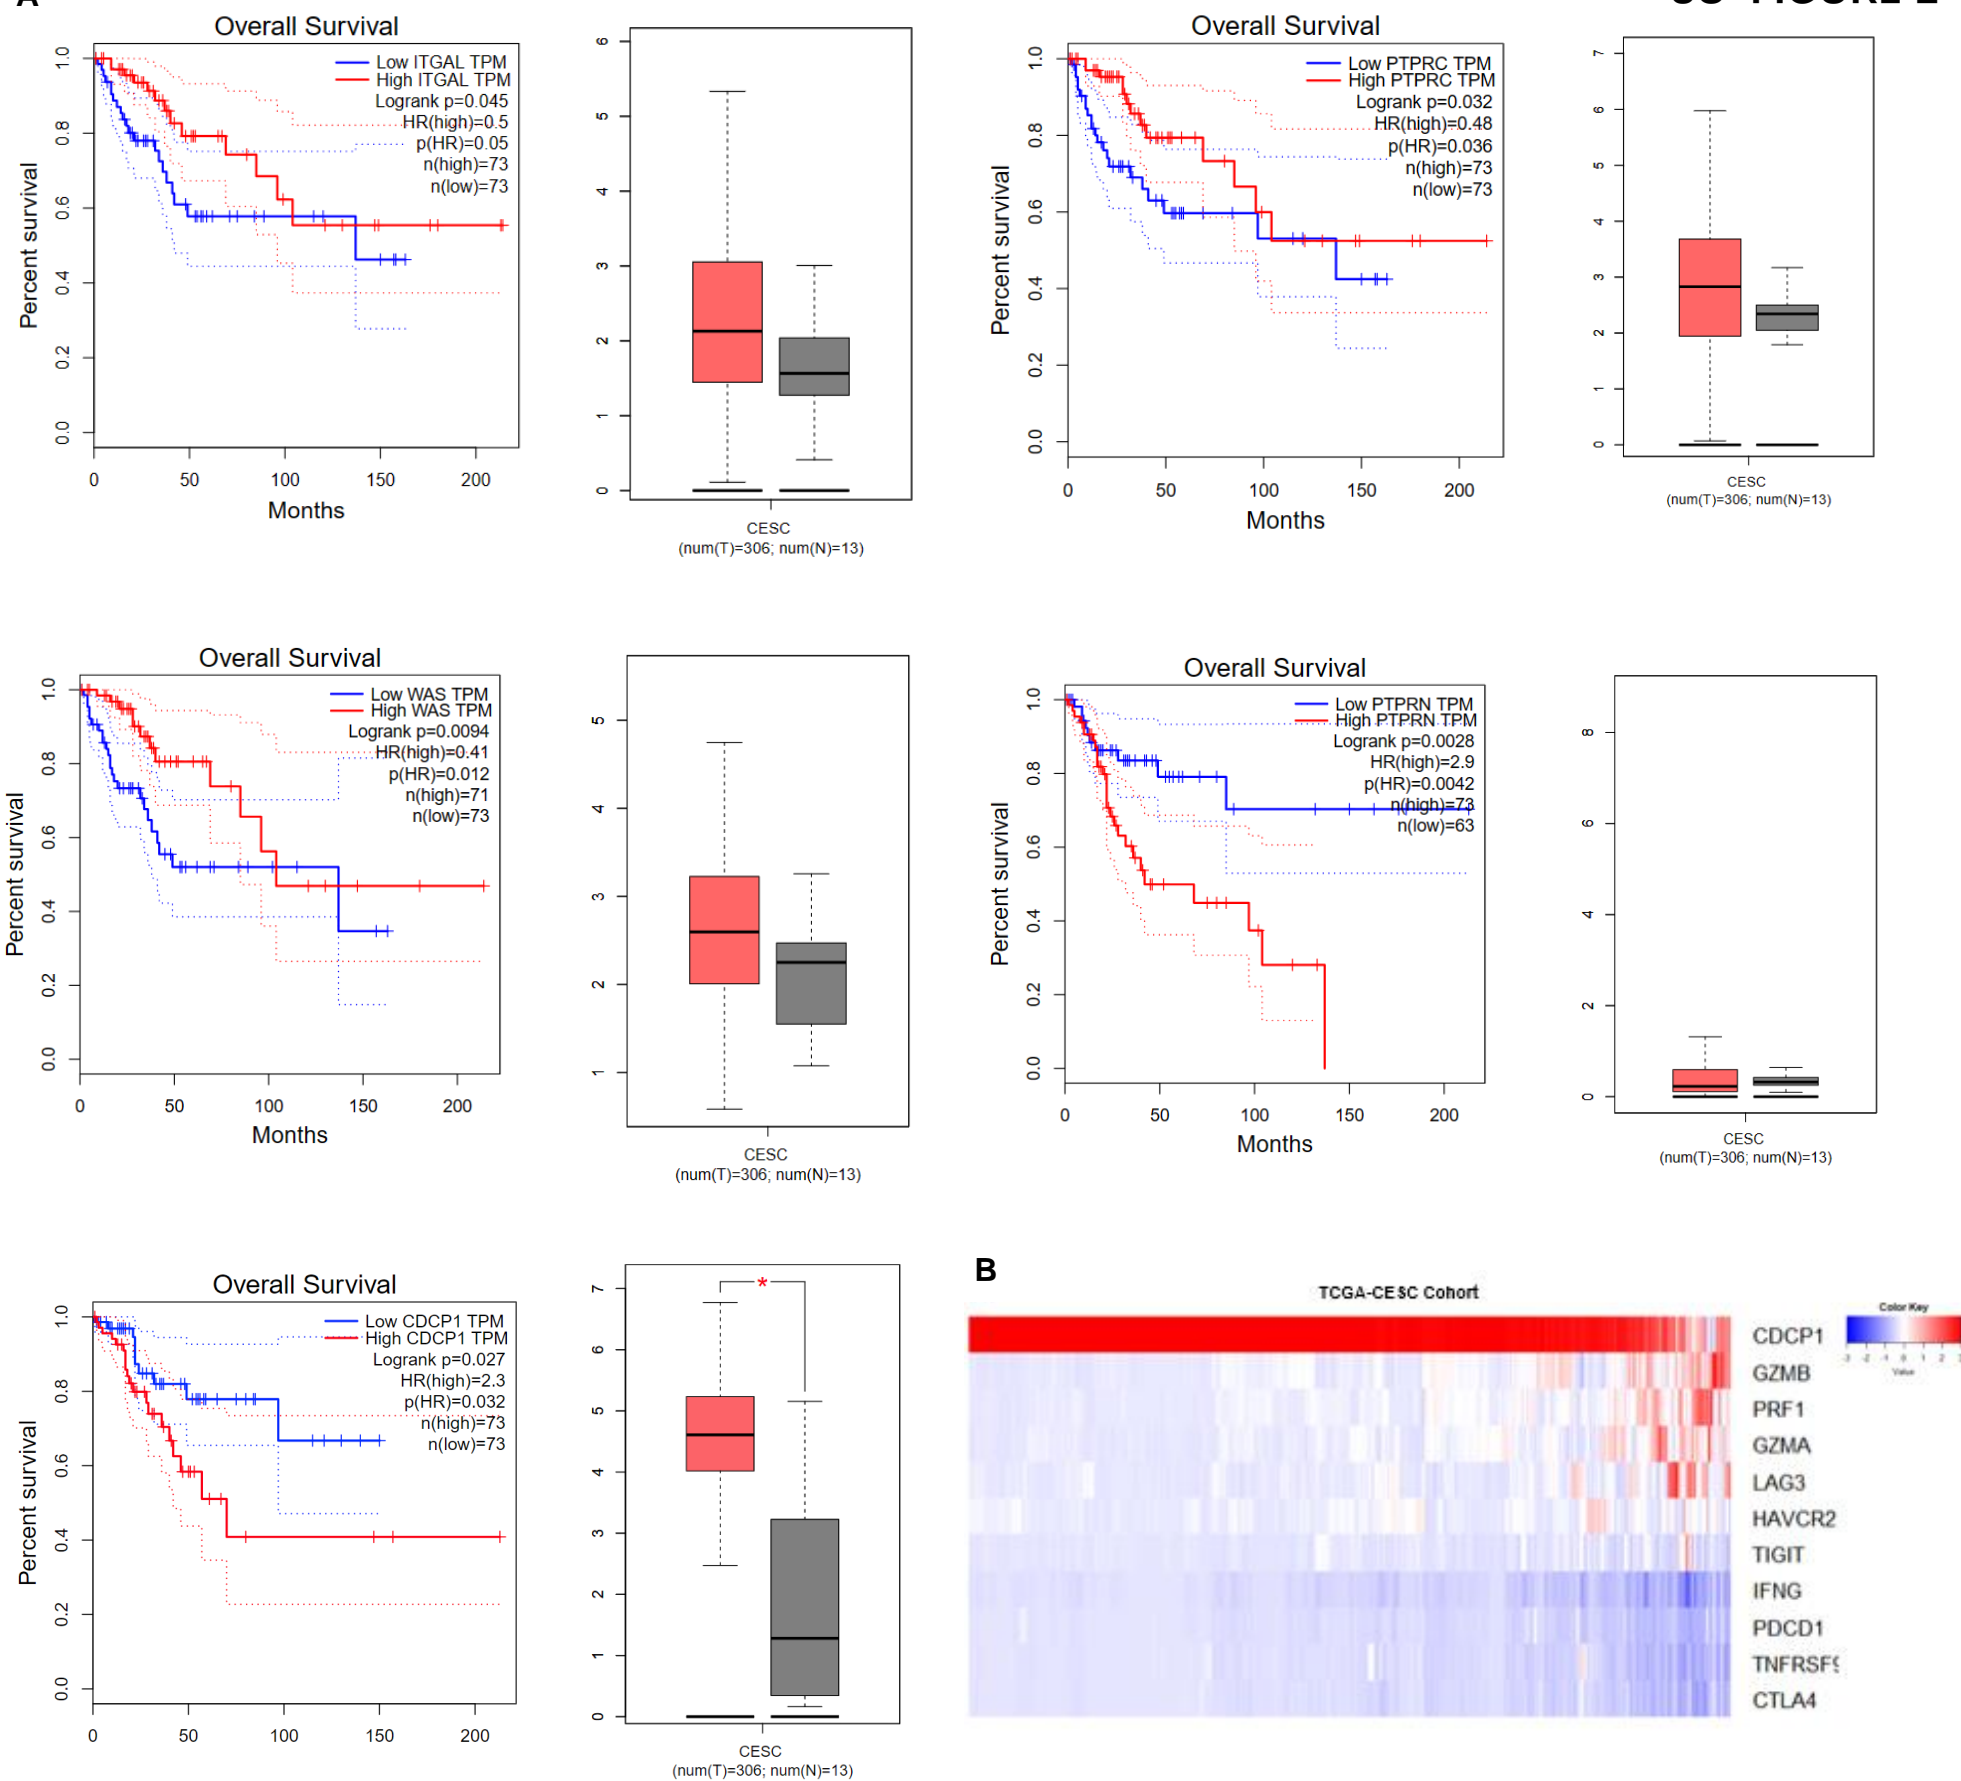

**Supplementary Figure 1. Survival analysis and expression levels of potential cervical cancer immunotherapy targets in TCGA database.**

A. Survival analysis and expression levels of ITGAL, PTPRC, PTPRN, WAS, and CDCP1 in the TCGA cervical cancer database. \*:  $P < 0.05$ .

B. Heatmap of the correlation between CDCP1 and functional and exhaustion markers of T cells CDCP1 in the TCGA cervical cancer database.

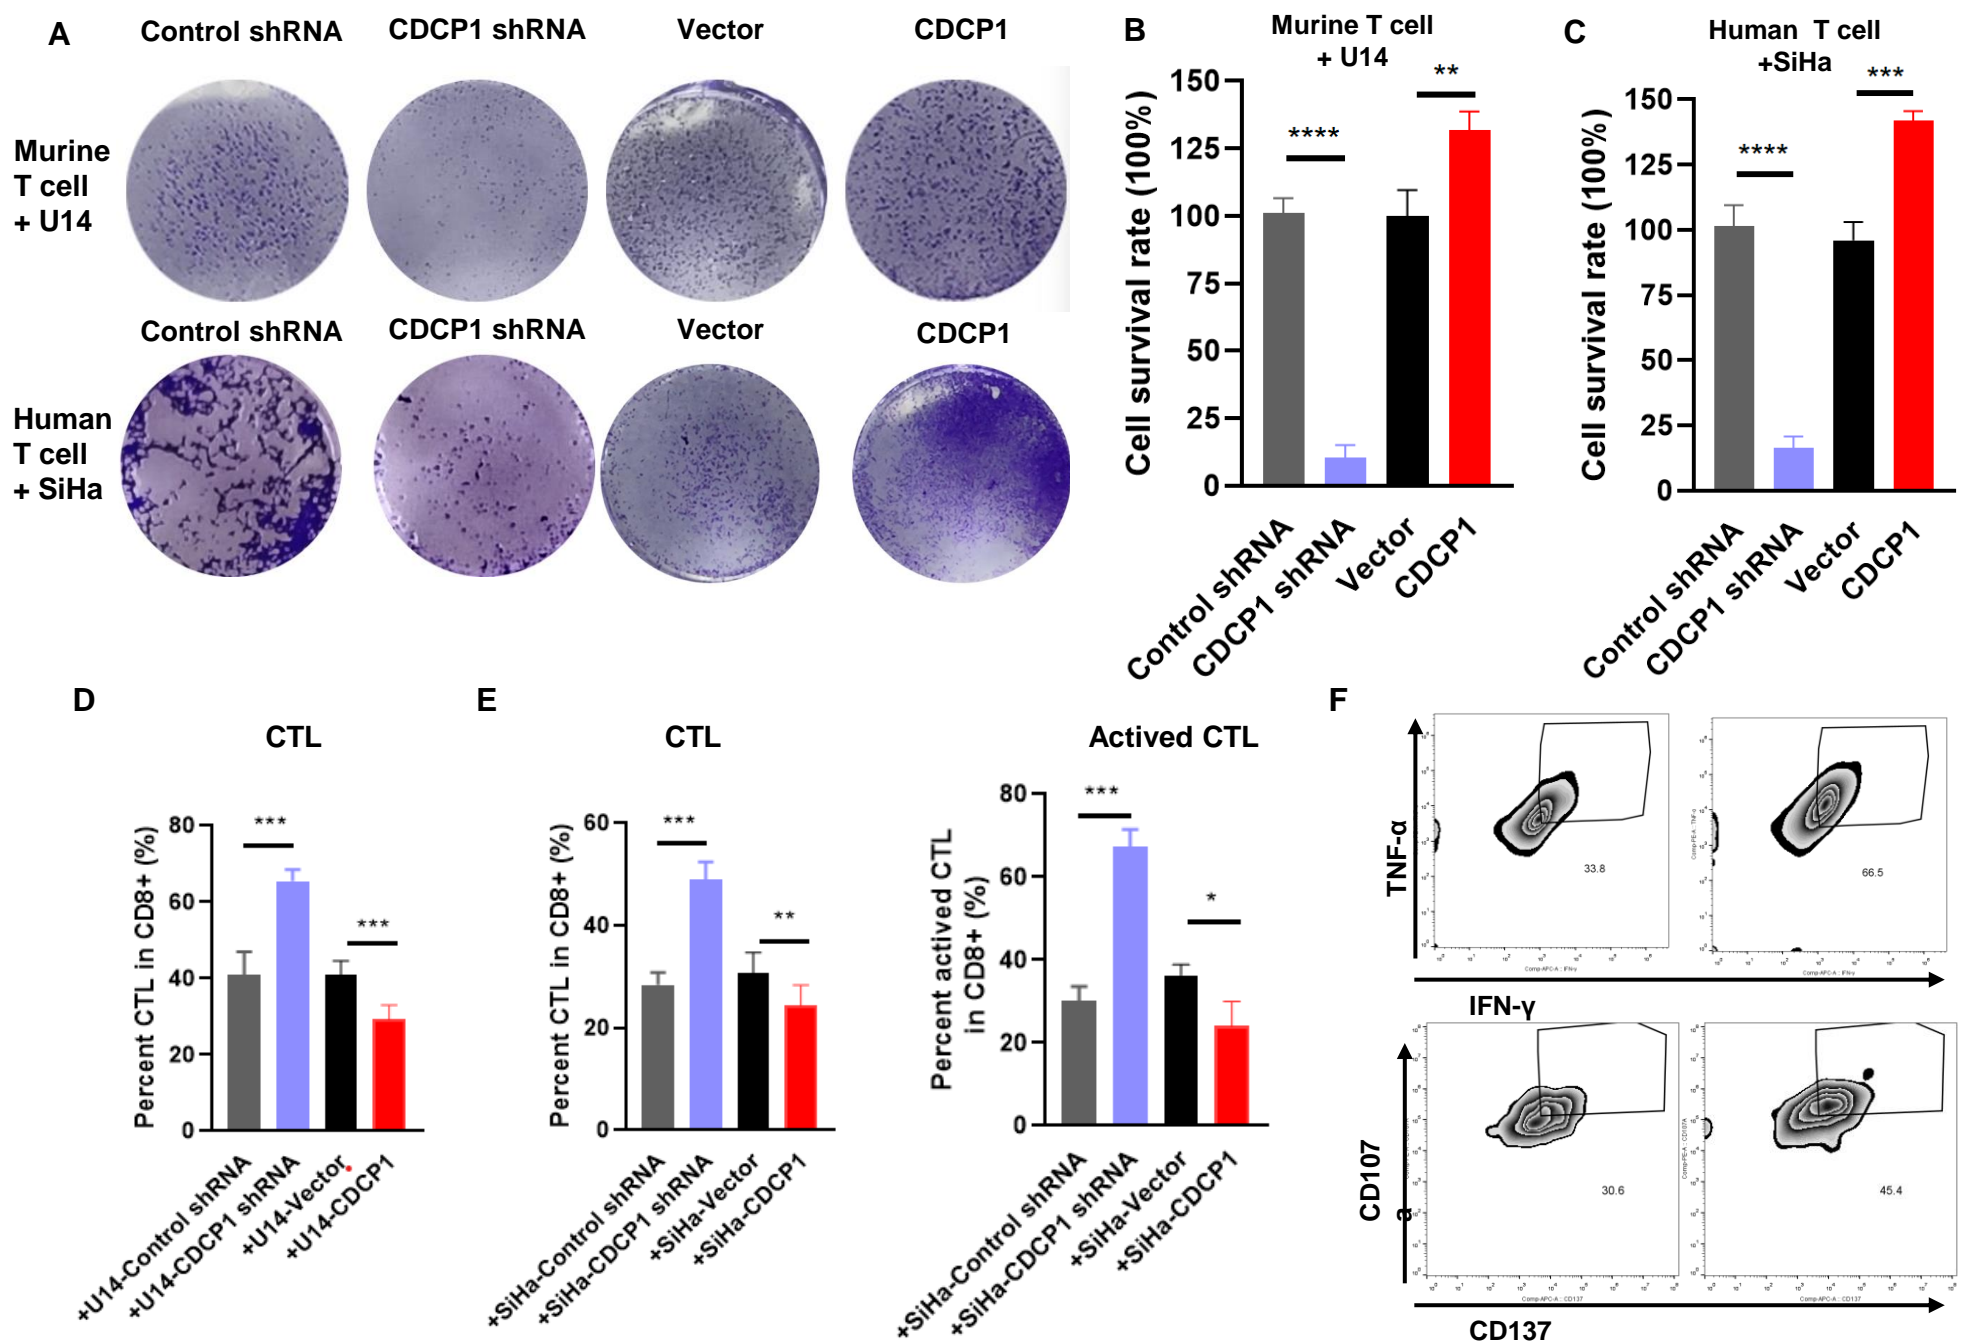

**Supplementary Figure 2. Different expression level of CDCP1 affected T cell specific killing effort in vitro.**

A-C. Murine U14 cells and Human SiHa cells with different CDCP1 level were co-cultured with activated T cells. Cells were subjected to crystal violet staining. Relative fold ratios of surviving tumor cell intensities are shown in (B) Murine U14 cell & (C) Human SiHa cell.

D. T cell co-culture assay. Murine T cells were co-cultured with different CDCP1 levels of U14 cells. Analysis with flow Cytometry. Frequencies of IFN $\gamma$ <sup>+</sup> and GZMB<sup>+</sup> CTLs were quantified.

E&F: T cell co-culture assay. Human T cells were co-cultured with different levels of SiHa cells. Analysis with flow Cytometry. Frequencies of IFN $\gamma$ <sup>+</sup> GZMB<sup>+</sup> CTLs and CD107a<sup>+</sup>CD137<sup>+</sup> activated CTL were quantified. (F) showed Representative Flow Cytometry Images Frequencies of IFN $\gamma$ <sup>+</sup> GZMB<sup>+</sup> CTLs and CD107a<sup>+</sup>CD137<sup>+</sup> activated CTL. . Data represent at least three independent experiments. statistical significance of the difference was performed using Student's *t* test between groups. ns, not significant, \**P* < 0.05, \*\**P* < 0.01, \*\*\**P* < 0.001 and \*\*\*\**P* < 0.0001.
