# Supplementary material for: Targeting CDCP1 boost CD8+ T cells-mediated cytotoxicity in cervical cancer via the JAK/STAT signaling pathway
Source: PubMed Central journal article supplement — J Immunother Cancer. 2024 Oct 24;12(10):e009416. doi: 10.1136/jitc-2024-009416 (PMC11529519; doi:10.1136/jitc-2024-009416), 2024-10-24
Supplement: jitc-12-10-s002.pdf [file jitc-12-10-s002.pdf]

# Targeting CDCP1 boost CD8+ T cells-mediated cytotoxicity in cervical cancer via the JAK/STAT signaling pathway

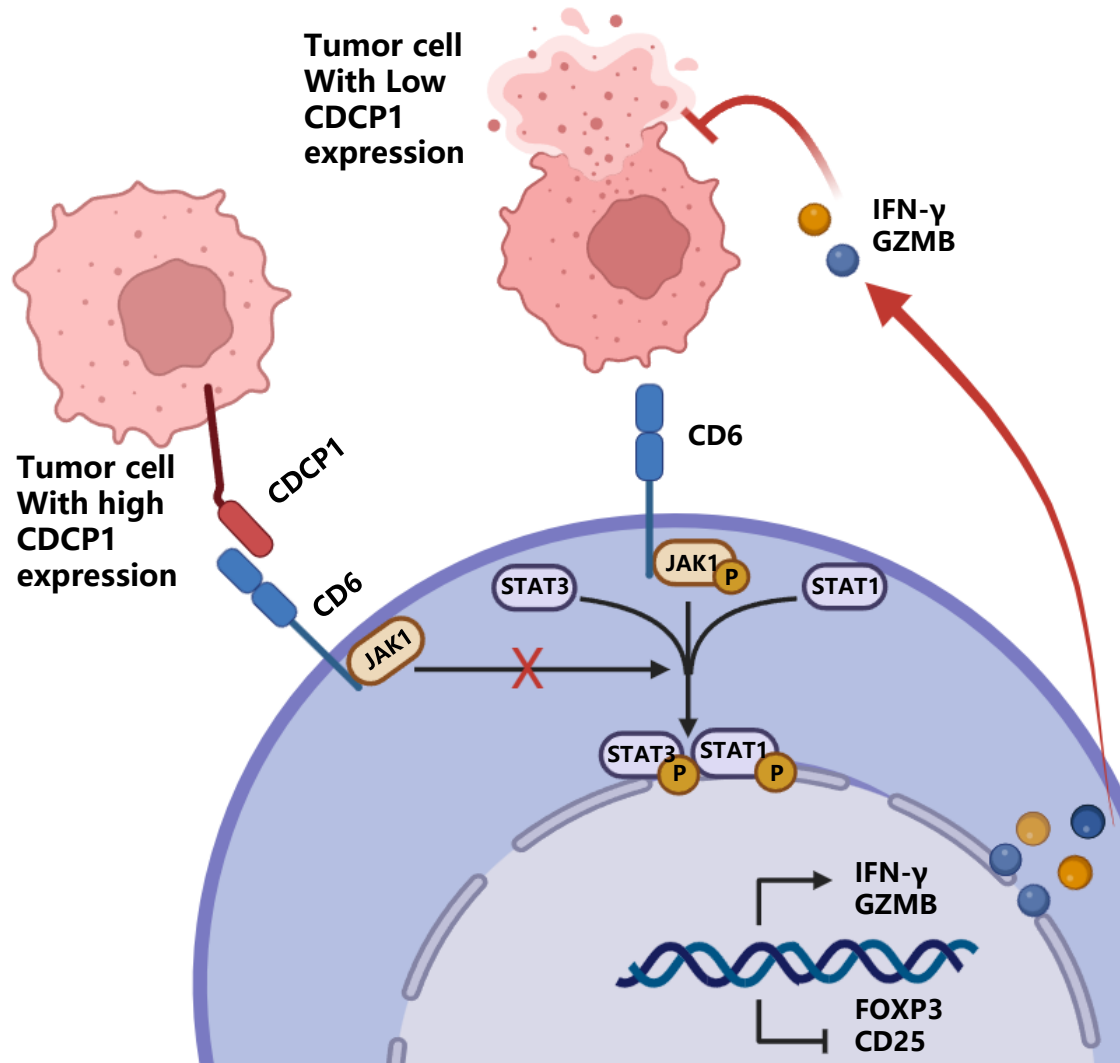

## Authors

Hua Huang, Yuwen Pan, Qiuwen Mai, Chunyu Zhang, Qiqiao Du, Yuandong Liao, Shuhang Qin, Yili Chen, Jiaming Huang, Jie Li, Tianyu Liu, Qiaojian Zou, Yijia Zhou, Li Yuan, Wei Wang, Yanchun Liang, Chao yun Pan, Junxiu Liu, and Shuzhong Yao

## Correspondence

[yaoshuzh@mail.sysu.edu.cn](mailto:yaoshuzh@mail.sysu.edu.cn)

## In Brief

High expression of CDCP1 in cervical cancer can transmit signals through CD6 on the surface of T cells, inhibiting the JAK-STAT pathway within T cells, suppressing the differentiation of cytotoxic T cells, promoting the generation of Tregs, inhibiting anti-tumor immunity, and facilitating the in vivo growth of cervical cancer tumors.
